# Supplementary material for: Improving the power factor and figure of merit of p-type CuSbSe2via introducing Sb vacancies
Source: Royal Society of Chemistry journal article supplement (doi:10.1039/d1tc02728j), 2021-01-01
Supplement: d1tc02728j1.pdf [file d1tc02728j1.pdf]

Supporting Information

## **Improving power factor and figure of merit of p-type CuSbSe<sub>2</sub> via introducing Sb vacancies**

Tao Chen<sup>a,b</sup>, Hongwei Ming<sup>a,b</sup>, Xiaoying Qin<sup>a,\*</sup>, Chen Zhu<sup>a,b</sup>, Lulu Huang<sup>a,b</sup>, Yunxiang Hou<sup>c</sup>, Di Li<sup>a,\*</sup>, Jian Zhang<sup>a,\*</sup>, Hongxing Xin<sup>a</sup>

<sup>a</sup> Key Lab of Photovoltaic and Energy Conservation Materials, Institute of Solid State Physics, HFIPS, Chinese Academy of Sciences, Hefei 230031, China.

<sup>b</sup> University of Science and Technology of China, Hefei 230026, China.230601, P. R. China

<sup>c</sup> MIIT Key Laboratory of Advanced Metallic and Intermetallic Materials Technology, School of Materials Science and Engineering, Nanjing University of Science and Technology, Nanjing 210094, China.

\* Corresponding author:

E-mail address: [xyqin@issp.ac.cn](mailto:xyqin@issp.ac.cn) (X.Y. Qin), [lidi@issp.ac.cn](mailto:lidi@issp.ac.cn) (D.Li), [zhangjian@issp.ac.cn](mailto:zhangjian@issp.ac.cn) (J.Zhang)

## 1. The density( $d$ ) and the relative density( $d_r$ ) of $\text{CuSb}_{1-x}\text{Se}_2$ ( $x=0-0.12$ )

Table S1. The density( $d$ ) and the relative density( $d_r$ ) of  $\text{CuSb}_{1-x}\text{Se}_2$ ( $x=0-0.12$ )

| $\text{CuSb}_{1-x}\text{Se}_2$ | $d$ (g cm <sup>3</sup> ) | $d_r$ (%) |
|--------------------------------|--------------------------|-----------|
| $x=0$                          | 5.71                     | 97.1      |
| $x=0.03$                       | 5.85                     | 99.4      |
| $x=0.06$                       | 5.86                     | 99.6      |
| $x=0.09$                       | 5.84                     | 99.3      |
| $x=0.12$                       | 5.85                     | 99.4      |

2. The temperature dependence of  $C_p$  for  $\text{CuSb}_{1-x}\text{Se}_2$  ( $x=0-0.12$ ) samples.

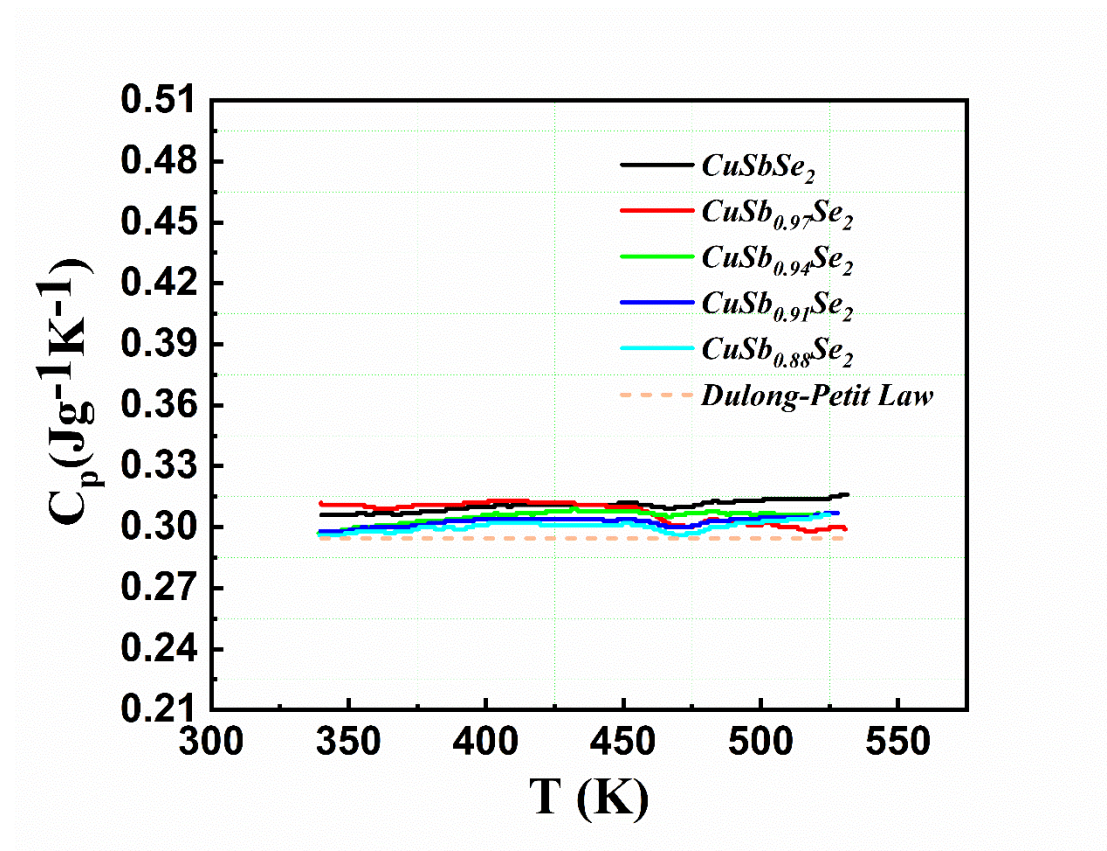

Figure S1. The temperature dependence of  $C_p$  for  $\text{CuSb}_{1-x}\text{Se}_2$  ( $x=0-0.12$ ) samples.

**3. EDAX measurement for all samples of  $\text{CuSb}_{1-x}\text{Se}_2$  ( $x=0, 0.03, 0.06, 0.09$  and  $0.12$ ).**

**Table S2 Compositions of all samples measured with EDAX.**

|                                                   | <b>Cu (At%)</b> | <b>Sb (At%)</b> | <b>Se (At%)</b> |
|---------------------------------------------------|-----------------|-----------------|-----------------|
| <b><math>\text{CuSbSe}_2</math></b>               | <b>27.5</b>     | <b>26.3</b>     | <b>46.2</b>     |
| <b><math>\text{CuSb}_{0.97}\text{Se}_2</math></b> | <b>27.6</b>     | <b>26.1</b>     | <b>46.3</b>     |
| <b><math>\text{CuSb}_{0.94}\text{Se}_2</math></b> | <b>28.0</b>     | <b>25.7</b>     | <b>46.4</b>     |
| <b><math>\text{CuSb}_{0.91}\text{Se}_2</math></b> | <b>28.6</b>     | <b>25.6</b>     | <b>45.8</b>     |
| <b><math>\text{CuSb}_{0.88}\text{Se}_2</math></b> | <b>29.1</b>     | <b>24.5</b>     | <b>46.4</b>     |
